# Supplementary material for: Initial-stage oriented-attachment one-dimensional assembly of nanocrystals: fundamental insight with a collision–recrystallization model
Source: Royal Society of Chemistry journal article supplement (doi:10.1039/c5ra08796a), 2015-01-01
Supplement: c5ra08796a1.pdf [file c5ra08796a1.pdf]

Supporting Information

**Initial-stage oriented-attachment one-dimensional assembly of nanocrystals:  
Fundamental insight with a collision-recrystallization model**

Yu Pan,<sup>1†</sup> Weiqiang Lv,<sup>1†</sup> Yinghua Niu,<sup>1</sup> Kechun Wen,<sup>1</sup> Xiaorong Hou,<sup>1</sup> Jianmin Gu,<sup>1</sup> Minda Zou,<sup>1</sup>  
Luhan Ye,<sup>1</sup> Wei Wang,<sup>2</sup> Kelvin HL Zhang,<sup>3\*</sup> Weidong He<sup>1,4,5\*</sup>

<sup>1</sup> School of Energy Science and Engineering, University of Electronic Science and Technology of China (UESTC), Chengdu 611731, PR China, <sup>2</sup> School of Materials Science and Engineering, Shenzhen Graduate School, Harbin Institute Technology, Shenzhen 518055, PR China, <sup>3</sup> Department of Materials Science & Metallurgy, University of Cambridge, 27 Charles Babbage Road, Cambridge, UK CB3 0FS, <sup>4</sup> Interdisciplinary Program in Materials Science, Vanderbilt University, Nashville, Tennessee 37234-0106, USA, <sup>5</sup> Vanderbilt Institute of Nanoscale Science and Engineering, Vanderbilt University, Nashville, Tennessee 37234-0106, USA. Correspondence and requests for materials should be addressed to K.H.L. Zhang and W. He. (Emails: hz256@cam.ac.uk, [weidong.he@uestc.edu.cn](mailto:weidong.he@uestc.edu.cn) and [weidong.he@vanderbilt.edu](mailto:weidong.he@vanderbilt.edu)). †These two authors contribute equally to this work.

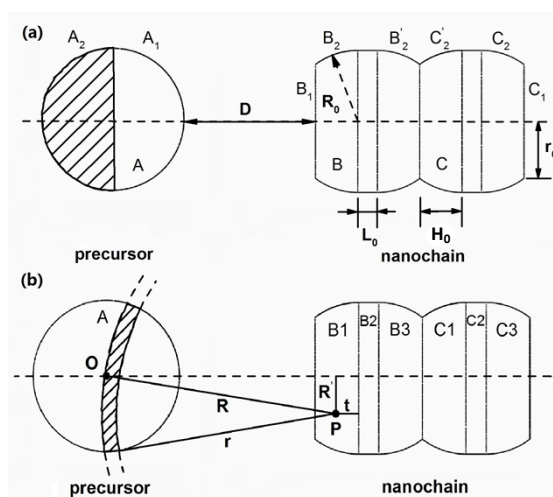

**Figure S1.** Configuration of the approaching spherical precursor and the growing nanochain: (a) illustration of geometrical parameters in the derivation of the geometric relations and the EDL interaction, (b) illustration of geometrical parameters for the derivation of the vdW interaction.

**Derivation of the geometric relations**

As shown in Figure S1a, the correlation between these two radii can be expressed in Eq. S1,

$$r_0 = \left( R_0^2 - H_0^2 \right)^{1/2} \quad (\text{S1})$$

where  $H_0$  is the thickness of the nanochain spherical segment.  $r_0$  and  $R_0$  the radii of two side surfaces of the spherical segment, respectively.

In our model, it is assumed that the nanochain maintains a fixed volume and a fixed radius in the evolution of the nanochain to nanorod. So, the volume identity can be given is Eq. S2,

$$\pi R_0^2 L_0 + \frac{1}{3} \pi H_0 (3R_0^2 + 3r_0^2 + H_0^2) = \frac{4}{3} \pi R_0^3 \quad (\text{S2})$$

where  $L_0$  is the length of the cylindrical part in the nanochain.

Simplifying Eq. S2, we obtain the expression of the length  $L_0$  in Eq. S3.

$$L_0 = \frac{4R_0^3 - 6H_0R_0^2 + 2H_0^3}{3R_0^2} \quad (S3)$$

### ***Curve fitting of the temperature dependence of surface potential***

The surface potential  $\psi_0$  of the nanoparticles can be determined by the Nernst equation as shown in Eq. S4,<sup>1</sup>

$$\psi_0 = \frac{k_B T}{xe} \ln\left(\frac{c}{c_{zp}}\right) \quad (S4)$$

where  $k_B$  is the Boltzmann constant,  $e$  is the elementary charge,  $T$  represents the temperature of the solution,  $x$  is the valence number of the potential-determining ions  $M^{x+}$ ,  $c$  is the concentration of the potential-determining ions  $M^{x+}$ , and  $c_{zp}$  is denoted as p.z.c. (point of zero charge).  $c_{zp}$  is expressed as the form of negative decimal logarithm in Eq. S5.

$$pM_{pzc} = -\log(c_{zp}) \quad (S5)$$

The correlation between the  $pM_{pzc}$  and the temperature can be deduced from the Gibbs-Helmholtz equation as shown in Eq. S6,<sup>2,3</sup>

$$2R \ln(10) \left( \frac{1}{2} pL - pM_{pzc} \right) = \frac{\Delta H^*}{T} - \Delta S^* \quad (S6)$$

where  $pL$  is the negative decimal logarithm of the solubility product of the potential-determining ions,  $R$  is the ideal gas constant, and  $\Delta H^*$  and  $\Delta S^*$  are the standard differential enthalpy and the standard differential entropy of ions transfer, respectively.

The temperature dependence of the  $pL$  of silver iodide has been measured in experiments by Lyklema, as shown in Table 1.<sup>2</sup>

| <b>Temperature (K)</b> | <b>pL</b>    |
|------------------------|--------------|
| <b>278</b>             | <b>17.20</b> |
| <b>288</b>             | <b>16.32</b> |
| <b>298</b>             | <b>15.73</b> |
| <b>308</b>             | <b>15.13</b> |
| <b>318</b>             | <b>14.61</b> |
| <b>328</b>             | <b>14.06</b> |
| <b>338</b>             | <b>13.59</b> |
| <b>348</b>             | <b>13.12</b> |
| <b>358</b>             | <b>12.69</b> |

For obtaining the expression of the temperature dependence of  $pL$ , the curve fitting is applied. Fitted by the rational function with one numerator degree and one denominator degree, the correlation between the  $pL$  and the temperature is shown in Eq. S7.

$$pL = \frac{1.267T + 3191}{T - 71.41} \quad (S7)$$

The coefficient of determination of this curve fitting  $R^2$  is equal to 0.9992 indicating that the curve fits well the experiment data.

By substituting Eqs. S5, S6 and S7 into Eq. S4, the temperature dependence of  $\psi_0$  is shown in Eq. S8,

$$\psi_0 = \frac{k_B T}{e} \left[ \ln(c_0) + \frac{\ln(10)}{2} \frac{1.267T + 3191}{T - 71.41} - \frac{1}{2R} \left( \frac{\Delta H^*}{T} - \Delta S^* \right) \right] \quad (S8)$$

where  $\Delta H^* = 76.82$  kJ/Mol,  $\Delta S^* = 175.30$  J/Mol·K for silver iodide, and  $c_0 = 1.333 \times 10^{-5}$  Mol/L by assuming  $\psi_0 = 50$  mV at 298 K.

### ***Derivation of the EDL interaction between the growing nanochain and spherical precursor NC***

The EDL interaction energy per unit area between two infinite flat surfaces is given by Eq. S9,<sup>1</sup>

$$E(h) = 64k_B T n_\infty \kappa^{-1} \Upsilon_0^2 \exp(-\kappa h) \quad (S9)$$

where  $n_\infty$  is the concentration of indifferent ions far from nanoparticles and  $h$  is the separation between two infinite flat surfaces. For the  $z : z$  supporting electrolyte, the Debye–Hückel length  $\kappa^{-1}$  is given in Eq. S10,<sup>1</sup>

$$\kappa = \left( \frac{2z^2 e^2 n_\infty}{\varepsilon k_B T} \right)^{1/2} \quad (S10)$$

where  $\varepsilon$  represents the absolute permittivity of the solution. The parameter  $\Upsilon_0$  is expressed as Eq. S11.<sup>1</sup>

$$\Upsilon_0 = \frac{\exp(ze\psi_0 / 2k_B T) - 1}{\exp(ze\psi_0 / 2k_B T) + 1} \quad (S11)$$

Hereby, the EDL interaction between curved surfaces by the surface element integration (SEI) is shown in Eq. S12,<sup>4</sup>

$$U_{EDL} = \int_{S_1} dU = \int_{A_1} \mathbf{n}_2 \cdot \mathbf{k}_2 \frac{\mathbf{n}_1 \cdot \mathbf{k}_1}{|\mathbf{n}_1 \cdot \mathbf{k}_1|} E(h) dA_1 \quad (S12)$$

where  $\mathbf{n}_1$  and  $\mathbf{n}_2$  are the unit normal vectors outward the approximated surface,  $\mathbf{k}_1$  and  $\mathbf{k}_2$  are the unit vectors which are parallel with the respective  $z$  axes, and  $dA_1$  is the infinitesimal projected area of the surface element  $dS_1$ .

As shown in Figure 1a, the total EDL interaction can be viewed as the superposition of two parts of interaction: the forward hemispherical facet  $A_1$  of the precursor with the nanochain BC and the backward one  $A_2$  with the nanochain BC, as given in Eq. S13.

$$U_{EDL} = U_{EDL}^{A_1 BC} + U_{EDL}^{A_2 BC} \quad (S13)$$

The EDL interaction between the hemispherical facet  $A_1$  and the nanochain BC can be divided further into six subdivisions as shown in Eq. S14.

$$U_{EDL}^{A_1 BC} = U_{EDL}^{A_1 B_1} + U_{EDL}^{A_1 B_2} + U_{EDL}^{A_1 B_2'} + U_{EDL}^{A_1 C_2} + U_{EDL}^{A_1 C_2'} + U_{EDL}^{A_1 C_1} \quad (S14)$$

These six EDL interactions are figured out in the cylindrical coordinate as follows,

$$U_{EDL}^{A_1 B_1} = \int_0^{r_0} E(R_0 + D - \sqrt{R_0^2 - r^2}) 2\pi r dr \quad (S15)$$

$$U_{EDL}^{A_1 B_2} = \int_{r_0}^{R_0} \sqrt{1 - (r/R_0)^2} E(R_0 + D + H_0 - 2\sqrt{R_0^2 - r^2}) 2\pi r dr \quad (S16)$$

$$U_{EDL}^{A_1B_2'} = \int_{r_0}^{R_0} -\sqrt{1-(r/R_0)^2} E(R_0 + D + H_0 + L_0) 2\pi r dr \quad (S17)$$

$$U_{EDL}^{A_1C_2'} = \int_{r_0}^{R_0} \sqrt{1-(r/R_0)^2} E(R_0 + D + 3H_0 + L_0 - 2\sqrt{R_0^2 - r^2}) 2\pi r dr \quad (S18)$$

$$U_{EDL}^{A_1C_2} = \int_{r_0}^{R_0} -\sqrt{1-(r/R_0)^2} E(R_0 + D + 3H_0 + 2L_0) 2\pi r dr \quad (S19)$$

$$U_{EDL}^{A_1C_1} = \int_0^{r_0} -E(R_0 + D + 4H_0 + 2L_0 - \sqrt{R_0^2 - r^2}) 2\pi r dr \quad (S20)$$

where D is the minimum separation between the precursor and the nanochain. Furthermore, the term

$\mathbf{n}_2 \cdot \mathbf{k}_2 \frac{\mathbf{n}_1 \cdot \mathbf{k}_1}{|\mathbf{n}_1 \cdot \mathbf{k}_1|}$  is equal to  $\pm 1$  for flat surfaces or  $\pm \sqrt{1-(r/R_0)^2}$  for spherical surfaces. Similarly, the

EDL interaction between the hemispherical facet  $A_2$  and nanochain BC can also be divided into six subdivisions as shown in Eq. S21.

$$U_{EDL}^{A_2BC} = U_{EDL}^{A_2B_1} + U_{EDL}^{A_2B_2} + U_{EDL}^{A_2B_2'} + U_{EDL}^{A_2C_2'} + U_{EDL}^{A_2C_2} + U_{EDL}^{A_2C_1} \quad (S21)$$

These six EDL interactions are computed in the cylindrical coordinate as follows.

$$U_{EDL}^{A_2B_1} = \int_0^{r_0} -E(R_0 + D + \sqrt{R_0^2 - r^2}) 2\pi r dr \quad (S22)$$

$$U_{EDL}^{A_2B_2} = \int_{r_0}^{R_0} -\sqrt{1-(r/R_0)^2} E(R_0 + D + H_0) 2\pi r dr \quad (S23)$$

$$U_{EDL}^{A_2B_2'} = \int_{r_0}^{R_0} \sqrt{1-(r/R_0)^2} E(R_0 + D + H_0 + L_0 + 2\sqrt{R_0^2 - r^2}) 2\pi r dr \quad (S24)$$

$$U_{EDL}^{A_2C_2'} = \int_{r_0}^{R_0} -\sqrt{1-(r/R_0)^2} E(R_0 + D + 3H_0 + L_0) 2\pi r dr \quad (S25)$$

$$U_{EDL}^{A_2C_2} = \int_{r_0}^{R_0} \sqrt{1-(r/R_0)^2} E(R_0 + D + 3H_0 + 2L_0 + 2\sqrt{R_0^2 - r^2}) 2\pi r dr \quad (S26)$$

$$U_{EDL}^{A_2C_1} = \int_0^{r_0} E(R_0 + D + 4H_0 + 2L_0 + \sqrt{R_0^2 - r^2}) 2\pi r dr \quad (S27)$$

### ***Derivation of the vdW interaction between the growing nanochain and spherical precursor NC***

The vdW interaction energy between two macroscopic bodies is shown in Eq. S28,<sup>5</sup>

$$U_{vdW} = - \int_{V_1} dv_1 \int_{V_2} dv_2 \frac{q^2 \lambda}{r^6} \quad (S28)$$

where  $dv_1$  and  $dv_2$  are both the volume elements of macroscopic particles,  $V_1$  and  $V_2$  are the particle volumes,  $q$  is expressed as the atom density of the interactional particles,  $\lambda$  is defined as London-van der Waals constant, and  $r$  represents the separation between  $dv_1$  and  $dv_2$ . As shown in Figure 1b, the vdW interaction between the precursor and an atom of point P in the nanochain  $E_p$  can be written as Eq. S29.

$$E_p = - \int_{R-R_0}^{R+R_0} \frac{\pi \lambda q}{r^5 R} [R_0^2 - (R-r)^2] dr \quad (S29)$$

The integration result of Eq. S29 is given in Eq. S30.

$$E_p = -\frac{4\pi\lambda qR_0^3}{3(R^2 - R_0^2)^3} \quad (\text{S30})$$

If we integrate  $qE_p$  (point P) throughout the domain of one spherical segment of the nanochain, the vdW interaction between this spherical segment and the spherical precursor is given in Eq. S31.

$$U_{vdW} = -\int_0^{H_0} dt \int_0^{\sqrt{R_0^2 - t^2}} qE_p \cdot 2\pi R' dR' \quad (\text{S31})$$

If we integrate  $qE_p$  throughout the domain of one cylindrical part of the nanochain, the vdW interaction between this cylindrical part and the spherical precursor is shown in Eq. S32.

$$U_{vdW} = -\int_0^{L_0} dl \int_0^{R_0} qE_p \cdot 2\pi R' dR' \quad (\text{S32})$$

In general, the constant  $\pi^2 q^2 \lambda$  before the integration is substituted by the Hamaker constant  $A$ . Therefore, the vdW interactions between the precursor with the four spherical segments and two cylindrical parts are expressed as follows.

$$U_{vdW}^{AB1} = -\frac{8}{3} A \int_0^{H_0} dl \int_0^{\sqrt{R_0^2 - l^2}} \frac{R_0^3 R'}{[R'^2 + (R_0 + D + H_0 + l)^2 - R_0^2]^3} dR' \quad (\text{S33})$$

$$U_{vdW}^{AB2} = -\frac{8}{3} A \int_0^{L_0} dl \int_0^{R_0} \frac{R_0^3 R'}{[R'^2 + (R_0 + D + H_0 + l)^2 - R_0^2]^3} dR' \quad (\text{S34})$$

$$U_{vdW}^{AB3} = -\frac{8}{3} A \int_0^{H_0} dt \int_0^{\sqrt{R_0^2 - t^2}} \frac{R_0^3 R'}{[R'^2 + (R_0 + D + H_0 + L_0 + t)^2 - R_0^2]^3} dR' \quad (\text{S35})$$

$$U_{vdW}^{AC1} = -\frac{8}{3} A \int_0^{H_0} dt \int_0^{\sqrt{R_0^2 - t^2}} \frac{R_0^3 R'}{[R'^2 + (R_0 + D + 3H_0 + L_0 - t)^2 - R_0^2]^3} dR' \quad (\text{S36})$$

$$U_{vdW}^{AC2} = -\frac{8}{3} A \int_0^{L_0} dl \int_0^{R_0} \frac{R_0^3 R'}{[R'^2 + (R_0 + D + 3H_0 + L_0 + l)^2 - R_0^2]^3} dR' \quad (\text{S37})$$

$$U_{vdW}^{AC3} = -\frac{8}{3} A \int_0^{H_0} dt \int_0^{\sqrt{R_0^2 - t^2}} \frac{R_0^3 R'}{[R'^2 + (R_0 + D + 3H_0 + 2L_0 + t)^2 - R_0^2]^3} dR' \quad (\text{S38})$$

The total vdW interaction is the sum of these six parts, which is shown in Eq. S39.

$$U_{vdW} = U_{vdW}^{AB} + U_{vdW}^{AC} = U_{vdW}^{AB1} + U_{vdW}^{AB2} + U_{vdW}^{AB3} + U_{vdW}^{AC1} + U_{vdW}^{AC2} + U_{vdW}^{AC3} \quad (\text{S39})$$

## Reference

1. Hiemenz, P. C.; Rajagopalan, R. *Principles of Colloid and Surface Chemistry, revised and expanded*; CRC Press, 1997; Vol. 14.
2. Berube, Y.; de Bruyn, P. L. *Journal of Colloid and Interface Science* **1968**, *27*, 305.
3. Lopez Valdivieso, A.; Reyes Bahena, J.; Song, S.; Herrera Urbina, R. *Journal of colloid and interface science* **2006**, *298*, 1.
4. Bhattacharjee, S.; Elimelech, M.; Borkovec, M. *Croat. Chem. Acta* **1998**, *71*, 883.
5. Hamaker, H. *physica* **1937**, *4*, 1058.
